# Supplementary material
Source: Springer Nature journal article supplement (https://www.springermedizin.de/resource/supplementary/12916_2012_662_MOESM4_ESM.pdf/9597936)

**F1****Resistance**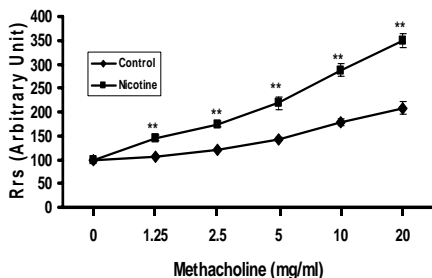**Compliance**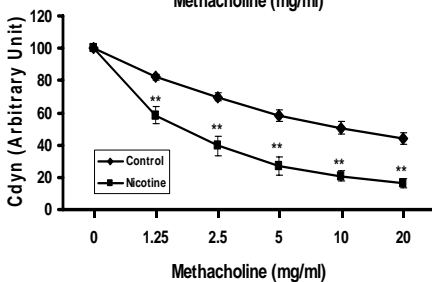**A****F2****Resistance**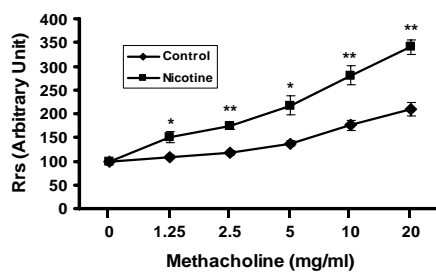**Compliance**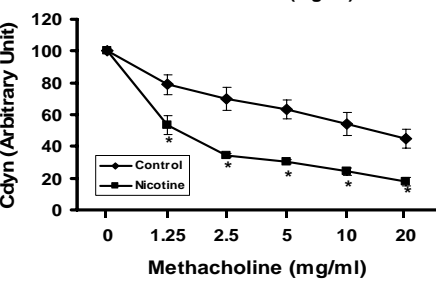**B****F1****Resistance**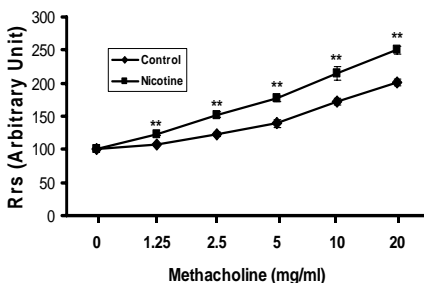**Compliance**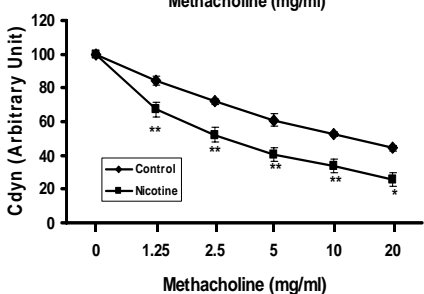**F2****Resistance**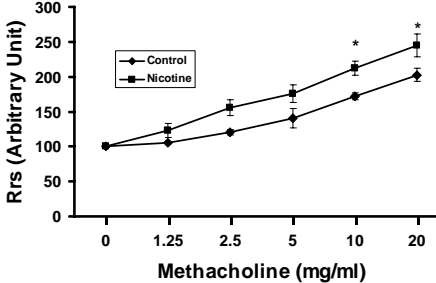**Compliance**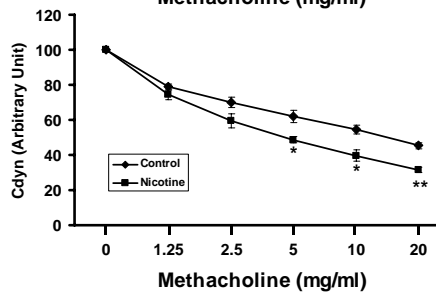

Supplement: MOESM4 [file 9597936]
